# Supplementary material for: Multiple Analysis and Characterization of Novel and Environmentally Friendly Feather Protein-Based Wood Preservatives
Source: MDPI journal article supplement (doi:10.3390/polym12010237), 2020-01-19
Supplement: s1 [file s1]

*Article*

# Multiple Analysis and Characterization of Novel and Environmentally Friendly Feather Protein-Based Wood Preservatives

Yan Xia <sup>1,2</sup>, Chengye Ma <sup>1</sup>, Hanmin Wang <sup>1</sup>, Shaoni Sun <sup>1</sup>, Jialong Wen <sup>1,\*</sup> and Runcang Sun <sup>1,3,\*</sup>

<sup>1</sup> Beijing Key Laboratory of Lignocellulosic Chemistry, Beijing Forestry University, Beijing 100083, China; xiayan@swfu.edu.cn (Y.X.); chengye.ma@foxmail.com (C.M.); wanghanmin798@163.com (H.W.); sunshaoni@bjfu.edu.cn (S.S.)

<sup>2</sup> College of Material Science and Engineering, South-west Forestry University, Kunming 650224, China

<sup>3</sup> Center for Lignocellulose Science and Engineering, Dalian Polytechnic University, Dalian 116034, China

\* Correspondence: wenjialong@bjfu.edu.cn (J.W.); rcsun3@bjfu.edu.cn (R.S.);  
Tel.: +86-10-62336903 (J.W. & R.S.); Fax: +86-10-62336903 (J.W. & R.S.)

## Supplementary caption

1. Target retention

2. Measured retention

3. Weight percent gain (WPG)

**Figure S1.** Raman spectra of wood samples before and after decay.

**Table S1.** The cost comparison between feather protein-based preservatives and commercial wood preservatives (CCA and ACQ)

### **1. Target retention**

Target retention means active ingredient absorbed in 1 m<sup>3</sup> of wood blocks by treating with the preservative.

### **2. Measured retention**

On account of wood structure is porous and capillary, the target retention could not be completely achieved due to the air pressure presents in the wood cell wall. Consequently, the actual retention needs to be measured to determine the active ingredient actually absorbed in the treated wood blocks. Measured retention is calculated by the difference between the final wet weights after treatment and the dry weights before treatment. Treatability meant the actual percentage retention through the ratio of measured retention and target retention for the preservative.

$$\text{Measured retention} = (m_1 - m_0) \times \text{Concentration}_{\text{Cu/B}}$$

### **3. Weight percent gain (WPG)**

WPG means the weight gain rate of the treated wood blocks, which is calculated by the difference between the final dry weights before and after treatment, representing the actual ingredients of the preservative ultimately left in the wood.

$$\text{WPG} = \frac{m_2 - m_0}{m_0} \times 100\%$$

In the formula,  $m_0$  is the dry weight of wood block sample before immersed in the preservatives.  $m_1$  is the wet weight of wood block sample after immersed in the preservatives without drying.  $m_2$  is the dry weight of wood block sample after immersed in the preservatives through drying.

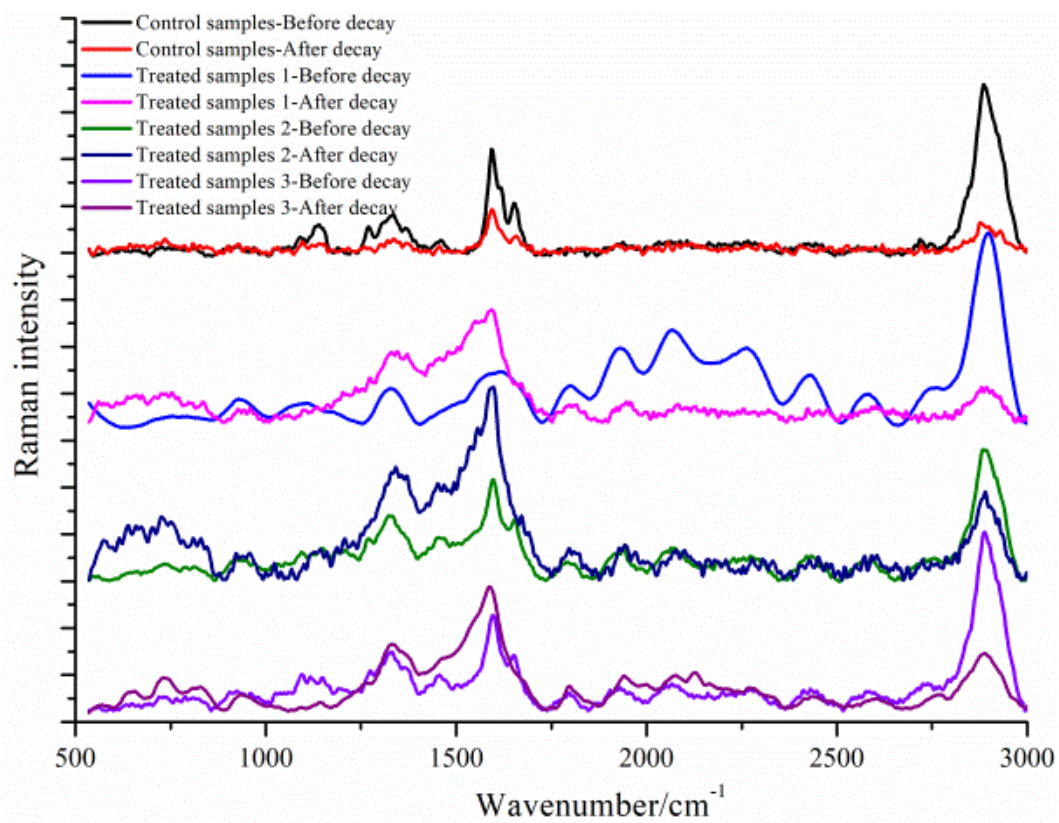

Fig. S1

**Table S1.** The cost comparison between feather protein-based preservatives and commercial wood preservatives (CCA and ACQ)

|                               | P <sub>1</sub> , Cu-B-Pr | P <sub>2</sub> , Cu-B-Pr-HA | P <sub>3</sub> , Cu-B-Pr-Go |
|-------------------------------|--------------------------|-----------------------------|-----------------------------|
| Copper sulfate                | 156-180                  | 156-180                     | 156-180                     |
| Sodium borate                 | 80-160                   | 80-160                      | 80-160                      |
| Condensed protein hydrolyzate | Free                     | Free                        | Free                        |
| Ammonium hydroxide            | 80-100                   | 80-100                      | 80-100                      |
| Nano-carrier                  | --                       | 800-1200                    | 1000-3000                   |
| Total /RMB·m <sup>3</sup>     | 320-450                  | 1250-1650                   | 1450-3450                   |
| CCA /RMB·m <sup>3</sup>       | 2000-3000                | ACQ /RMB·m <sup>3</sup>     | 2000-3000                   |

The current costs of feather protein-based preservatives, CCA and ACQ are compared in the Table S1. As can be seen from Table S1, the costs of feather protein-based preservatives are obviously lower than CCA and ACQ preservatives, mainly attributed to the free feather protein, which is the industrial waste materials need to be disposed of chicken farm. In consequence from the comparison, the feather protein-based preservative is a kind of cost-competitive wood preservatives.
